# Supplementary material
Source: PubMed Central journal article supplement (PMC6925656)
Supplement: NIHMS1043666-supplement-Supp_FigS1.pdf [file NIHMS1043666-supplement-Supp_FigS1.pdf]

**Figure S1: Time dependence of sorafenib transport in HEK293 cells overexpressing human OCT2 or human OCT3.**

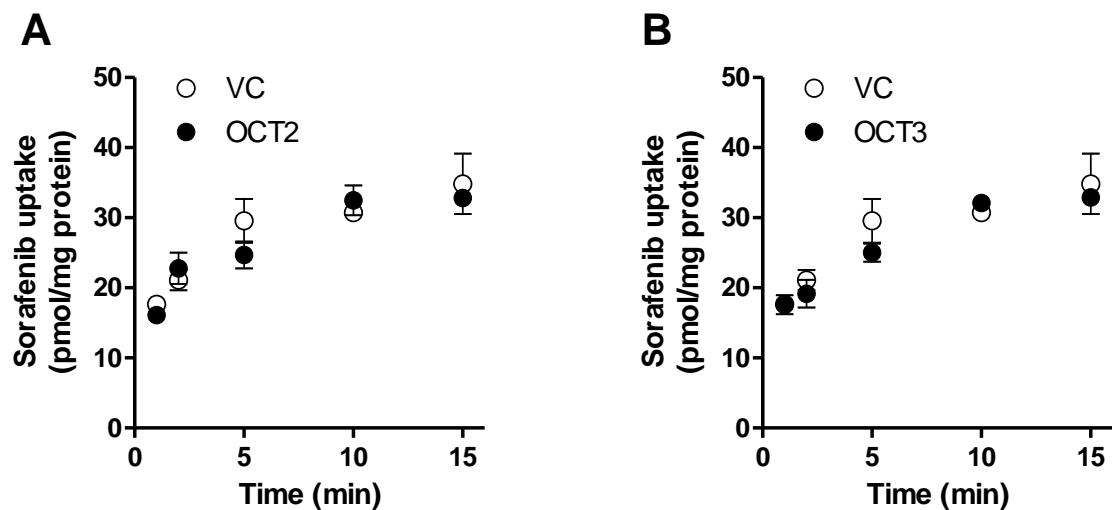

Comparison between uptake of sorafenib (0.2  $\mu$ M) into HEK293 cells expressing an empty pcDNA3 vector (VC), human OCT2 (A) or human OCT3 (B). Data are presented as mean (symbols) and SD (error bars) of 3 observations.
