# Supplementary material
Source: PubMed Central journal article supplement (PMC6925656)
Supplement: NIHMS1043666-supplement-Supp_FigS2.pdf [file NIHMS1043666-supplement-Supp_FigS2.pdf]

**Figure S2: Evaluation of mouse OCT1 (mOCT1) and mouse OCT2 (mOCT2) as transporters of sorafenib.**

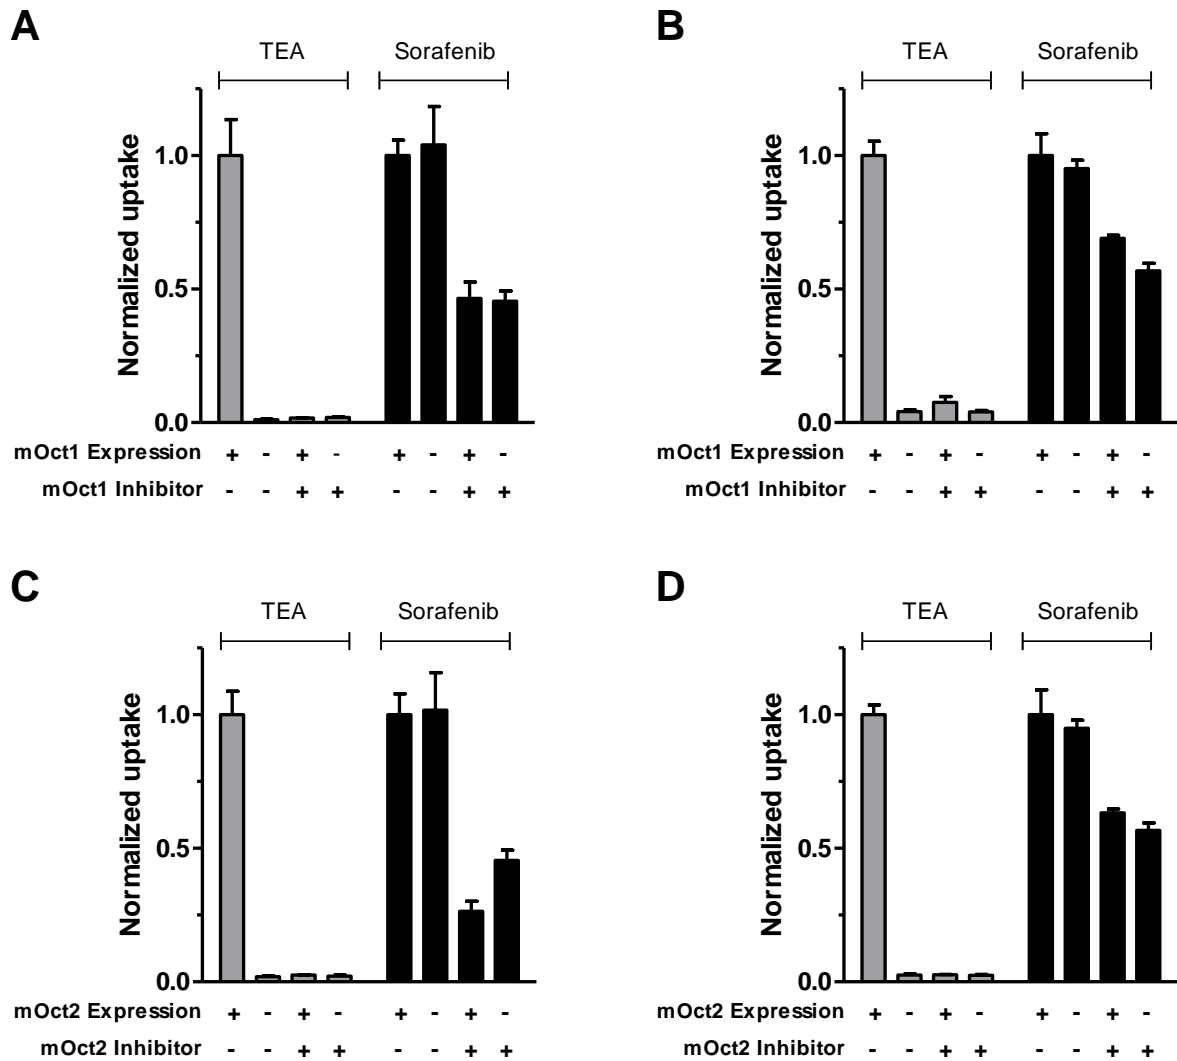

(A, B) Comparison between uptake of the mOCT2 probe substrate TEA (100  $\mu$ M) and 0.2  $\mu$ M sorafenib (A) or 2  $\mu$ M sorafenib (B) into HEK293 cells expressing an empty pcDNA3 vector or mouse Oct1 in the presence or absence of the OCT1 inhibitor decynium22 (5  $\mu$ M) after 10 min incubations. (C, D) The same experiment was performed with 0.2  $\mu$ M sorafenib (C) or 2  $\mu$ M sorafenib (D) into HEK293 cells expressing vector control or mouse Oct2 in the presence or absence of the OCT2 inhibitor decynium22 (5  $\mu$ M) after 10 min incubations. Data are presented as mean (bars) and SE (error bars) of 6 observations.
