# Supplementary material
Source: PubMed Central journal article supplement (PMC6925656)
Supplement: NIHMS1043666-supplement-Supp_FigS3.pdf [file NIHMS1043666-supplement-Supp_FigS3.pdf]

**Figure S3: Influence of OCT1-deficiency on the plasma pharmacokinetics of sorafenib-glucuronide**

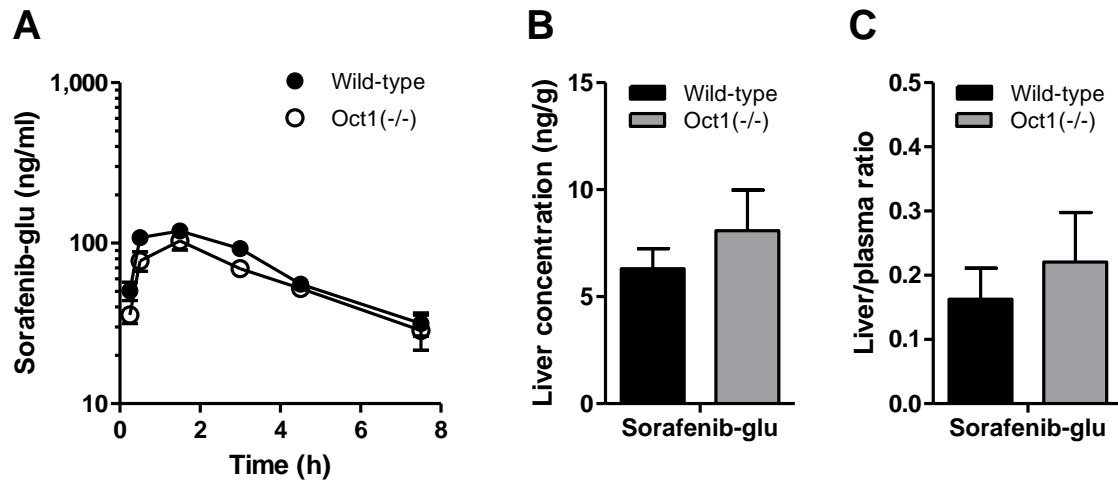

(A) Plasma sorafenib-glucuronide concentration time curve; (B) liver levels and (C) liver-to-plasma ratios of sorafenib-glucuronide at the end of the experimental sampling period (7.5 h)
