# Supplementary material
Source: PubMed Central journal article supplement (PMC6925656)
Supplement: NIHMS1043666-supplement-Supp_info.pdf [file NIHMS1043666-supplement-Supp_info.pdf]

## Supplementary Material

### Sorafenib activity and disposition in liver cancer does not depend on organic cation transporter 1 (OCT1)

Mingqing Chen<sup>1</sup>, Claudia Neul<sup>2,3</sup>, Elke Schaeffeler<sup>2,3,4</sup>, Franziska Frisch<sup>2,3</sup>, Stefan Winter<sup>2,3</sup>, Matthias Schwab<sup>2,4,5</sup>, Hermann Koepsell<sup>6</sup>, Shuiying Hu<sup>1</sup>, Stefan Laufer<sup>4,7</sup>, Sharyn D. Baker<sup>1</sup>, Alex Sparreboom<sup>1§</sup> and Anne T. Nies<sup>2,3,4§</sup>

§ Alex Sparreboom and Anne T. Nies contributed equally to this work

<sup>1</sup>Division of Pharmaceutics and Pharmaceutical Chemistry, College of Pharmacy, The Ohio State University, Columbus, Ohio

<sup>2</sup>Dr. Margarete Fischer-Bosch Institute of Clinical Pharmacology, Stuttgart, Germany

<sup>3</sup>University of Tübingen, Tübingen, Germany

<sup>4</sup>iFIT Cluster of Excellence, University of Tübingen, Tübingen, Germany

<sup>5</sup>Departments of Clinical Pharmacology, Pharmacy and Biochemistry, University of Tübingen, Tübingen, Germany

<sup>6</sup>Institute of Anatomy and Cell Biology and Department of Molecular Plant Physiology and Biophysics, University of Würzburg, Germany

<sup>7</sup>Department of Pharmaceutical and Medicinal Chemistry, University of Tübingen, Tübingen, Germany

#### Corresponding author:

Anne T. Nies, [anne.nies@ikp-stuttgart.de](mailto:anne.nies@ikp-stuttgart.de)

Dr. Margarete Fischer-Bosch Institute of Clinical Pharmacology,

Auerbachstrasse 112, 70376 Stuttgart, Germany;

Phone: +49 711 8101 3729

Fax: +49 711 859295

The corresponding author confirms full access to all data in the study and final responsibility for the manuscript.

**Conflict of interest:** The authors declared no competing interests for this work.

#### Financial support

This work was in part supported by the Robert-Bosch Foundation, Stuttgart, Germany, the Interfaculty Centre for Pharmacogenomics and Pharma Research (ICEPHA) Grant Tübingen–Stuttgart, Germany, the Deutsche Forschungsgemeinschaft (DFG, German Research Foundation) under Germany's Excellence Strategy - EXC 2180 – 390900677, National Institutes of Health (NIH) grants R01CA138744 and R01CA215802, and Pelotonia, Ohio, USA.

**Keywords:** Sorafenib, Multi-kinase inhibitor, Hepatocellular carcinoma, Transporters, OCT1

## Supplementary Methods

### Chemicals and reagents

General tritium-labeled sorafenib and sorafenib-N-oxide (specific activity, >37 GBq/mmol; radiochemical purity, >97.1%) were purchased from Moravek. The positive control substrates [<sup>14</sup>C]tetraethylammonium bromide (TEA; specific activity, 130 MBq/mmol) and [<sup>3</sup>H]1-methyl-4-phenylpyridinium ([<sup>3</sup>H]MPP, 2.96 TBq/mmol) were obtained from PerkinElmer and American Radiolabeled Chemicals Inc., respectively. Chemicals were obtained at the highest purity available from various commercial sources.

### Transport studies using OCT1-expressing oocytes

OCT1-expressing oocytes of *Xenopus laevis* were generated as described<sup>1</sup> using 0.1 µg/µl of human OCT1/SLC22A1 cRNA for injection. Oocytes were then stored for 2 days in Ori buffer at 16°C. For transport measurements, OCT1-expressing oocytes and non-injected control oocytes were incubated at room temperature for 20 minutes in Ori buffer as described<sup>1</sup> containing 12 nmol/l [<sup>3</sup>H]MPP or 1 µmol/l [<sup>3</sup>H]sorafenib in the absence or presence of the OCT1 substrate and inhibitor MPP. The oocytes were then washed 3 times in ice-cold Ori buffer, solubilized in 5% sodium dodecyl sulfate (SDS), and intracellular radioactivity was analyzed by liquid scintillation counting (Packard TriCarb 1600; PerkinElmer, Waltham, MA, USA).

### Mammalian cell culture and immunolabeling of cells

HepG2, HEK293 and Huh7 cells were maintained in DMEM medium (Sigma) and HeLa cells in RPMI-1640 medium (Biochrom) with 10% fetal calf serum (FCS) and glutamine. HeLa cells were used within 6 months of purchase from ATCC. HepG2, Huh7, HEK-VC and HEK-OCT1 cells were authenticated by short tandem repeat fingerprinting analysis (DSMZ, Braunschweig, Germany) and also regularly tested for mycoplasma using a PCR detection kit (Venor®GeM Classic, Minerva Biolabs GmbH, Berlin, Germany) as described.<sup>1,2</sup> Confocal laser scanning microscopy was performed on cells immune-labeled with an OCT1-specific

Supplementary document: Sorafenib activity and disposition in liver cancer does not depend on organic cation transporter 1 (OCT1)

polyclonal rabbit antiserum (1:300).<sup>1,3</sup> Total RNA was isolated from liver cancer cell lines and transfected HEK cells as described<sup>1</sup> and *OCT1/SLC22A1* transcript levels were determined with a primer/probe assay as described.<sup>1</sup>

### Statistical analysis

Data are presented as mean  $\pm$  SD, unless stated otherwise. Group differences were evaluated using an unpaired t-test (2 groups) or one-way ANOVA (>2 groups) in GraphPad Prism 6, and the cut-off for statistical significance was set at  $P < 0.05$ . Luminescence values of melting curves and isothermal inhibitor dose-response curves acquired with the InCell Pulse Target Engagement Assay were fitted to the sigmoidal dose response equation using Prism.

### References

1. Nies, A. T. *et al.* Cellular uptake of imatinib into leukemic cells is independent of human organic cation transporter 1 (OCT1). *Clin.Cancer Res.* **20**, 985–994 (2014).
2. Emami Riedmaier, A. *et al.* Variability in hepatic expression of organic anion transporter 7/SLC22A9, a novel pravastatin uptake transporter: impact of genetic and regulatory factors. *Pharmacogenomics J.* **16**, 341–351 (2016).
3. Nies, A. T. *et al.* Expression of organic cation transporters OCT1 (SLC22A1) and OCT3 (SLC22A3) is affected by genetic factors and cholestasis in human liver. *Hepatology* **50**, 1227–1240 (2009).
