# Supplementary material
Source: PubMed Central journal article supplement (PMC6925656)
Supplement: NIHMS1043666-supplement-Supp_TableS1.pdf [file NIHMS1043666-supplement-Supp_TableS1.pdf]

Supplementary document: Sorafenib activity and disposition in liver cancer does not depend on organic cation transporter 1 (OCT1)

**Table S1: Sorafenib pharmacokinetic parameters in wild-type and OCT1(-/-) mice after a single oral dose of 10 mg/kg.**

| Compound                     | Parameter                | Mouse genotype |               |
|------------------------------|--------------------------|----------------|---------------|
|                              |                          | Wild-type      | OCT1(-/-)     |
| <b>Sorafenib</b>             | C <sub>max</sub> (µg/ml) | 5.21 ± 0.40    | 5.41 ± 0.43   |
|                              | AUC (µg×h/ml)            | 20.6 ± 1.55    | 19.3 ± 2.04   |
| <b>Sorafenib-N-oxide</b>     | C <sub>max</sub> (µg/ml) | 0.174 ± 0.020  | 0.188 ± 0.018 |
|                              | AUC (µg×h/ml)            | 0.730 ± 0.070  | 0.676 ± 0.070 |
| <b>Sorafenib-glucuronide</b> | C <sub>max</sub> (µg/ml) | 2.20 ± 2.06    | 1.37 ± 0.909  |
|                              | AUC (µg×h/ml)            | 3.73 ± 3.09    | 2.80 ± 1.43   |

Data are presented as mean ± SD. *Abbreviations:* C<sub>max</sub>, peak plasma concentration; AUC, area under the plasma concentration-time curve.
