# Supplementary material
Source: PubMed Central journal article supplement (PMC6925656)
Supplement: NIHMS1043666-supplement-Supp_TableS2.pdf [file NIHMS1043666-supplement-Supp_TableS2.pdf]

**Table S2: Drug transporter inhibitors for chemical screening to characterize sorafenib uptake by HepG2 and Huh7 cells**

| Drug transporter class                         | Compound                                              | References |
|------------------------------------------------|-------------------------------------------------------|------------|
| Organic cation transporters, OCTs              | TEA, MPP, amantadine, decynium22, prazosin, quinidine | 1,2        |
| Novel organic cation transporters, OCTNs       | ergothioneine, L-carnitine, trifluoperazine           | 3          |
| Multidrug and toxin extrusion proteins, MATEs  | diphenhydramine, pyrimethamine                        | 4,5        |
| Amino-acid transporter LAT1                    | BCH                                                   | 6          |
| Monocarboxylate transporters, MCTs             | AR-C155858, CHC                                       | 7          |
| Nucleoside transporters, CNTs, ENTs            | NBTI, dipyridamole                                    | 8          |
| Organic anion transporters, OATs               | probenecid                                            | 9          |
| Organic anion transporting polypeptides, OATPs | cyclosporin A                                         | 10         |

*Abbreviations:* BCH, 2-aminobicyclo-(2,2,1)-heptane-2-carboxylic acid; CHC,  $\alpha$ -cyano-4-hydroxycinnamic acid; MPP, 1-methyl-4-phenylpyridinium; NBTI, nitrobenzylthioinosine; TEA, tetraethylammonium

### References

1. Nies, A. T., Koepsell, H., Damme, K., Schwab, M., Fromm, M. F. & Kim, R. B. Organic cation transporters (OCTs, MATEs), in vitro and in vivo evidence for the importance in drug therapy. *Handb.Exp.Pharmacol.* **201**, 105–167 (2011).
2. Koepsell, H. The SLC22 family with transporters of organic cations, anions and zwitterions. *Mol.Aspects Med.* **34**, 413–435 (2013).

3. Diao, L., Ekins, S. & Polli, J. E. Quantitative structure activity relationship for inhibition of human organic cation/carnitine transporter. *Mol.Pharm.* **7**, 2120–2131 (2010).
4. Nies, A. T., Damme, K., Kruck, S., Schaeffeler, E. & Schwab, M. Structure and function of multidrug and toxin extrusion proteins (MATEs) and their relevance to drug therapy and personalized medicine. *Arch.Toxicol.* **90**, 1555–1584 (2016).
5. Tsuda, M. *et al.* Involvement of human multidrug and toxin extrusion 1 in the drug interaction between cimetidine and metformin in renal epithelial cells. *J.Pharmacol.Exp.Ther.* **329**, 185–191 (2009).
6. Geier, E. G. *et al.* Structure-based ligand discovery for the Large-neutral Amino Acid Transporter 1, LAT-1. *Proc.Natl.Acad.Sci. U S A* **110**, 5480–5485 (2013).
7. Ovens, M. J., Davies, A. J., Wilson, M. C., Murray, C. M. & Halestrap, A. P. AR-C155858 is a potent inhibitor of monocarboxylate transporters MCT1 and MCT2 that binds to an intracellular site involving transmembrane helices 7-10. *Biochem.J.* **425**, 523–530 (2010).
8. Young, J. D., Yao, S. Y., Baldwin, J. M., Cass, C. E. & Baldwin, S. A. The human concentrative and equilibrative nucleoside transporter families, SLC28 and SLC29. *Mol.Aspects Med.* **34**, 529–547 (2013).
9. Emami Riedmaier, A., Nies, A. T., Schaeffeler, E. & Schwab, M. Organic anion transporters and their implications in pharmacotherapy. *Pharmacol.Rev.* **64**, 421–449 (2012).
10. König, J., Müller, F. & Fromm, M. F. Transporters and drug-drug interactions: important determinants of drug disposition and effects. *Pharmacol.Rev.* **65**, 944–966 (2013).
